# Supplementary material
Source: PubMed Central journal article supplement (PMC7534544)
Supplement: NIHMS1632767-supplement-Supporting_Information.pdf [file NIHMS1632767-supplement-Supporting_Information.pdf]

**Supporting Information**

**Improving Protein-Ligand Docking Results with High-Throughput Molecular Dynamics Simulations**

Hugo Guterres<sup>1</sup> & Wonpil Im<sup>1,2\*</sup>

<sup>1</sup>Departments of Biological Sciences, Chemistry, and Bioengineering, Lehigh University, Bethlehem PA, 18015 USA

<sup>2</sup>School of Computational Sciences, Korea Institute for Advanced Study, Seoul 02455, Republic of Korea

**Corresponding Authors**

\*wonpil@lehigh.edu

**Table S1.** List of protein targets, active and decoy ligands selected from DUD-E dataset.

|    | Target PDB | Active 1          | Active 2          | Active 3         | Active 4          | Active 5          | Decoy 1          | Decoy 2          | Decoy 3          | Decoy 4          | Decoy 5          |
|----|------------|-------------------|-------------------|------------------|-------------------|-------------------|------------------|------------------|------------------|------------------|------------------|
| 1  | 2hzi       | CHEMBL<br>211508  | CHEMBL2<br>11662  | CHEMBL2<br>0252  | CHEMBL1<br>170747 | CHEMBL2<br>62276  | ZINC008<br>08935 | ZINC226<br>46098 | ZINC249<br>97377 | ZINC396<br>77074 | ZINC403<br>85343 |
| 2  | 2oi0       | CHEMBL<br>99103   | CHEMBL4<br>96368  | CHEMBL4<br>11305 | CHEMBL1<br>94237  | CHEMBL2<br>70063  | ZINC012<br>35888 | ZINC132<br>80529 | ZINC378<br>66429 | ZINC330<br>08530 | ZINC393<br>44954 |
| 3  | 3cqw       | CHEMBL<br>469561  | CHEMBL5<br>77379  | CHEMBL2<br>52259 | CHEMBL5<br>73334  | CHEMBL4<br>70192  | ZINC026<br>90713 | ZINC140<br>03249 | ZINC456<br>94681 | ZINC502<br>70626 | ZINC503<br>62264 |
| 4  | 3d0e       | CHEMBL<br>374742  | CHEMBL2<br>13618  | CHEMBL2<br>27381 | CHEMBL2<br>52856  | CHEMBL2<br>28812  | ZINC193<br>98206 | ZINC368<br>70839 | ZINC501<br>14681 | ZINC115<br>29351 | ZINC441<br>66584 |
| 5  | 2hv5       | CHEMBL<br>8370    | CHEMBL1<br>38065  | CHEMBL3<br>95347 | CHEMBL8<br>4446   | CHEMBL4<br>94058  | ZINC057<br>30951 | ZINC321<br>21238 | ZINC516<br>36984 | ZINC449<br>76032 | ZINC638<br>11272 |
| 6  | 1l2s       | 319               | 211               | 322              | 113               | 320               | ZINC195<br>06390 | ZINC212<br>87922 | ZINC138<br>61566 | ZINC501<br>99382 | ZINC688<br>80478 |
| 7  | 2am9       | CHEMBL<br>1393    | CHEMBL3<br>76847  | CHEMBL1<br>99899 | CHEMBL2<br>38001  | CHEMBL3<br>02870  | ZINC028<br>35078 | ZINC118<br>01997 | ZINC000<br>36233 | ZINC373<br>10434 | ZINC032<br>59126 |
| 8  | 1s3b       | CHEMBL<br>522271  | CHEMBL1<br>51125  | CHEMBL6<br>07864 | CHEMBL4<br>64798  | CHEMBL4<br>89720  | ZINC118<br>86501 | ZINC349<br>40037 | ZINC416<br>56634 | ZINC391<br>19782 | ZINC615<br>90662 |
| 9  | 1bcd       | CHEMBL<br>89163   | CHEMBL3<br>45776  | CHEMBL2<br>05867 | CHEMBL3<br>53861  | CHEMBL2<br>6537   | ZINC058<br>30065 | ZINC219<br>03832 | ZINC403<br>58206 | ZINC434<br>14178 | ZINC622<br>06512 |
| 10 | 2cnk       | CHEMBL<br>147642  | CHEMBL1<br>78674  | CHEMBL1<br>68816 | CHEMBL4<br>77047  | CHEMBL3<br>61983  | ZINC120<br>98797 | ZINC235<br>05401 | ZINC652<br>53144 | ZINC368<br>02732 | ZINC653<br>94084 |
| 11 | 1h00       | CHEMBL<br>1081852 | CHEMBL7<br>8959   | CHEMBL5<br>14197 | CHEMBL2<br>94884  | CHEMBL1<br>79599  | ZINC194<br>80756 | ZINC356<br>09516 | ZINC484<br>21039 | ZINC419<br>07749 | ZINC635<br>46948 |
| 12 | 3l5d       | CHEMBL<br>272718  | CHEMBL5<br>64530  | CHEMBL2<br>71914 | CHEMBL5<br>50208  | CHEMBL2<br>10240  | ZINC084<br>44232 | ZINC098<br>05239 | ZINC365<br>59262 | ZINC397<br>07508 | ZINC590<br>40500 |
| 13 | 1r9o       | CHEMBL<br>358216  | CHEMBL1<br>209842 | CHEMBL4<br>56432 | CHEMBL2<br>18068  | CHEMBL1<br>085744 | ZINC062<br>45263 | ZINC145<br>37615 | ZINC396<br>54133 | ZINC331<br>41095 | ZINC508<br>69827 |
| 14 | 3nxu       | CHEMBL<br>501315  | CHEMBL1<br>80805  | CHEMBL5<br>70596 | CHEMBL4<br>70996  | CHEMBL1<br>7157   | ZINC043<br>84876 | ZINC092<br>02440 | ZINC395<br>56501 | ZINC513<br>29954 | ZINC637<br>80577 |
| 15 | 3nxo       | CHEMBL<br>283311  | CHEMBL2<br>96525  | CHEMBL7<br>8104  | CHEMBL2<br>99927  | CHEMBL1<br>1187   | ZINC370<br>65287 | ZINC380<br>50221 | ZINC550<br>87613 | ZINC511<br>45872 | ZINC551<br>61439 |
| 16 | 2rgp       | CHEMBL<br>56142   | CHEMBL3<br>12482  | CHEMBL2<br>25929 | CHEMBL5<br>92211  | CHEMBL6<br>7027   | ZINC060<br>58181 | ZINC132<br>81321 | ZINC475<br>41419 | ZINC066<br>60208 | ZINC539<br>97371 |
| 17 | 1sj0       | CHEMBL<br>64692   | CHEMBL1<br>44195  | CHEMBL3<br>29312 | CHEMBL2<br>14200  | CHEMBL3<br>81566  | ZINC170<br>07619 | ZINC053<br>04053 | ZINC435<br>19218 | ZINC480<br>73983 | ZINC634<br>72933 |
| 18 | 3kl6       | CHEMBL<br>1095187 | CHEMBL4<br>34521  | CHEMBL4<br>04346 | CHEMBL2<br>52650  | CHEMBL5<br>93354  | ZINC032<br>95754 | ZINC013<br>27229 | ZINC354<br>50438 | ZINC010<br>22836 | ZINC133<br>72139 |
| 19 | 1w7x       | CHEMBL<br>194689  | CHEMBL2<br>04723  | CHEMBL7<br>6325  | CHEMBL1<br>99236  | CHEMBL3<br>3705   | ZINC200<br>70237 | ZINC370<br>19243 | ZINC435<br>14519 | ZINC396<br>85699 | ZINC371<br>52678 |
| 20 | 2nnq       | CHEMBL<br>1077990 | CHEMBL4<br>59902  | CHEMBL2<br>12860 | CHEMBL4<br>74743  | CHEMBL4<br>74744  | ZINC019<br>47101 | ZINC032<br>48830 | ZINC364<br>99046 | ZINC351<br>32400 | ZINC399<br>74365 |
| 21 | 1j4h       | CHEMBL<br>203094  | CHEMBL5<br>1710   | CHEMBL2<br>01785 | CHEMBL1<br>50062  | CHEMBL1<br>46919  | ZINC022<br>20932 | ZINC133<br>44672 | ZINC130<br>71544 | ZINC018<br>32454 | ZINC396<br>90662 |
| 22 | 3e37       | CHEMBL<br>121010  | CHEMBL3<br>55483  | CHEMBL2<br>9503  | CHEMBL2<br>6246   | CHEMBL1<br>84805  | ZINC047<br>79448 | ZINC052<br>03198 | ZINC373<br>48452 | ZINC022<br>53642 | ZINC592<br>65621 |
| 23 | 2v3f       | CHEMBL<br>10131   | CHEMBL2<br>74669  | CHEMBL4<br>22734 | CHEMBL1<br>76679  | CHEMBL5<br>9041   | ZINC057<br>22317 | ZINC353<br>59332 | ZINC409<br>62274 | ZINC428<br>09545 | ZINC128<br>43853 |
| 24 | 3kgc       | CHEMBL<br>297442  | CHEMBL5<br>36466  | CHEMBL2<br>4980  | CHEMBL1<br>28118  | CHEMBL2<br>17826  | ZINC016<br>28598 | ZINC193<br>20497 | ZINC406<br>17999 | ZINC010<br>27075 | ZINC435<br>11606 |
| 25 | 1vso       | CHEMBL<br>277281  | CHEMBL6<br>1751   | CHEMBL2<br>20509 | CHEMBL2<br>94792  | CHEMBL3<br>70038  | ZINC049<br>22477 | ZINC012<br>29134 | ZINC446<br>10418 | ZINC012<br>08863 | ZINC001<br>35647 |
| 26 | 3nf7       | CHEMBL<br>357646  | CHEMBL1<br>96391  | CHEMBL1<br>11182 | CHEMBL1<br>64     | CHEMBL3<br>40775  | ZINC066<br>02472 | ZINC128<br>17098 | ZINC404<br>33679 | ZINC543<br>03975 | ZINC618<br>28339 |
| 27 | 1xl2       | CHEMBL<br>171551  | CHEMBL1<br>22768  | CHEMBL2<br>9089  | CHEMBL4<br>6728   | CHEMBL1<br>63435  | ZINC027<br>00953 | ZINC131<br>83189 | ZINC169<br>18325 | ZINC365<br>02353 | ZINC394<br>04518 |
| 28 | 1uyg       | CHEMBL<br>379345  | CHEMBL4<br>38068  | CHEMBL3<br>39231 | CHEMBL3<br>99530  | CHEMBL3<br>64968  | ZINC021<br>92307 | ZINC103<br>33842 | ZINC389<br>71160 | ZINC396<br>84215 | ZINC536<br>20167 |
| 29 | 3f9m       | CHEMBL<br>562878  | CHEMBL1<br>164578 | CHEMBL6<br>06156 | CHEMBL5<br>73750  | CHEMBL5<br>75705  | ZINC010<br>68243 | ZINC090<br>87889 | ZINC239<br>36101 | ZINC359<br>34288 | ZINC382<br>49675 |
| 30 | 2oj9       | CHEMBL<br>467232  | CHEMBL5<br>58708  | CHEMBL5<br>62724 | CHEMBL4<br>11082  | CHEMBL5<br>57725  | ZINC026<br>42068 | ZINC089<br>18169 | ZINC167<br>79022 | ZINC396<br>69139 | ZINC053<br>65318 |
| 31 | 2h7l       | CHEMBL<br>424724  | CHEMBL2<br>59138  | CHEMBL4<br>26702 | CHEMBL2<br>64434  | CHEMBL4<br>08149  | ZINC127<br>78422 | ZINC265<br>43923 | ZINC338<br>40634 | ZINC357<br>45327 | ZINC488<br>16486 |

|    |      |                   |                   |                   |                  |                   |                  |                  |                  |                  |                  |
|----|------|-------------------|-------------------|-------------------|------------------|-------------------|------------------|------------------|------------------|------------------|------------------|
| 32 | 2ica | CHEMBL<br>521708  | CHEMBL4<br>87291  | CHEMBL1<br>82738  | CHEMBL1<br>00372 | CHEMBL1<br>81297  | ZINC061<br>49616 | ZINC096<br>34260 | ZINC098<br>05129 | ZINC395<br>56586 | ZINC347<br>48818 |
| 33 | 3lpb | CHEMBL<br>1080955 | CHEMBL1<br>081138 | CHEMBL1<br>093468 | CHEMBL5<br>69957 | CHEMBL5<br>70002  | ZINC045<br>36660 | ZINC099<br>15669 | ZINC408<br>26270 | ZINC173<br>04303 | ZINC234<br>64081 |
| 34 | 3g0e | CHEMBL<br>162     | CHEMBL4<br>14001  | CHEMBL4<br>06404  | CHEMBL2<br>12762 | CHEMBL2<br>55955  | ZINC002<br>10149 | ZINC027<br>41222 | ZINC509<br>11840 | ZINC421<br>42095 | ZINC499<br>56993 |
| 35 | 2b8t | CHEMBL<br>6497    | CHEMBL4<br>7089   | CHEMBL2<br>95648  | CHEMBL2<br>97987 | CHEMBL4<br>2389   | ZINC048<br>23566 | ZINC370<br>52694 | ZINC483<br>96899 | ZINC136<br>35926 | ZINC567<br>24128 |
| 36 | 2of2 | CHEMBL<br>386661  | CHEMBL1<br>079945 | CHEMBL3<br>06012  | CHEMBL3<br>04300 | CHEMBL1<br>076197 | ZINC048<br>25582 | ZINC116<br>16056 | ZINC041<br>72162 | ZINC007<br>13598 | ZINC639<br>93814 |
| 37 | 2aa2 | CHEMBL<br>258191  | CHEMBL1<br>214838 | CHEMBL1<br>03     | CHEMBL2<br>66282 | CHEMBL4<br>19633  | ZINC020<br>92881 | ZINC073<br>91881 | ZINC251<br>36070 | ZINC400<br>03117 | ZINC591<br>70524 |
| 38 | 2ojg | CHEMBL<br>375525  | CHEMBL2<br>35345  | CHEMBL2<br>20112  | CHEMBL5<br>99428 | CHEMBL3<br>73448  | ZINC040<br>96778 | ZINC004<br>01829 | ZINC337<br>90545 | ZINC038<br>97368 | ZINC456<br>26251 |
| 39 | 2zdt | CHEMBL<br>383348  | CHEMBL1<br>90742  | CHEMBL3<br>74431  | CHEMBL1<br>98687 | CHEMBL3<br>74269  | ZINC032<br>52100 | ZINC157<br>24338 | ZINC402<br>45979 | ZINC252<br>44585 | ZINC500<br>60931 |
| 40 | 2qd9 | CHEMBL<br>520967  | CHEMBL4<br>23196  | CHEMBL2<br>62867  | CHEMBL7<br>1425  | CHEMBL5<br>22579  | ZINC034<br>41520 | ZINC149<br>56094 | ZINC397<br>00227 | ZINC631<br>62907 | ZINC431<br>18036 |
| 41 | 830c | CHEMBL<br>104021  | CHEMBL5<br>78351  | CHEMBL1<br>83848  | CHEMBL3<br>5707  | CHEMBL1<br>086379 | ZINC060<br>04587 | ZINC100<br>55214 | ZINC038<br>71924 | ZINC147<br>50325 | ZINC338<br>14033 |
| 42 | 3eqh | CHEMBL<br>435734  | CHEMBL3<br>0359   | CHEMBL3<br>7493   | CHEMBL5<br>22892 | CHEMBL3<br>29492  | ZINC049<br>76490 | ZINC053<br>89757 | ZINC362<br>57402 | ZINC424<br>39251 | ZINC551<br>79637 |
| 43 | 1kvo | CHEMBL<br>356606  | CHEMBL1<br>09073  | CHEMBL2<br>92645  | CHEMBL3<br>56859 | CHEMBL3<br>50791  | ZINC007<br>15666 | ZINC131<br>69591 | ZINC043<br>61776 | ZINC132<br>14154 | ZINC062<br>67357 |
| 44 | 2p54 | CHEMBL<br>363018  | CHEMBL1<br>24079  | CHEMBL5<br>84704  | CHEMBL9<br>4306  | CHEMBL2<br>59055  | ZINC022<br>94109 | ZINC088<br>96449 | ZINC333<br>86214 | ZINC326<br>02868 | ZINC400<br>97853 |
| 45 | 3kba | CHEMBL<br>1164338 | CHEMBL2<br>80805  | CHEMBL4<br>13806  | CHEMBL5<br>0849  | CHEMBL1<br>163602 | ZINC000<br>53135 | ZINC005<br>45011 | ZINC368<br>25414 | ZINC362<br>78103 | ZINC402<br>17024 |
| 46 | 2azr | CHEMBL<br>212433  | CHEMBL2<br>67759  | CHEMBL5<br>92291  | CHEMBL2<br>4557  | CHEMBL5<br>56636  | ZINC089<br>25796 | ZINC123<br>76852 | ZINC397<br>21626 | ZINC179<br>57789 | ZINC398<br>27864 |
| 47 | 1njs | CHEMBL<br>309415  | CHEMBL4<br>53090  | CHEMBL8<br>4163   | CHEMBL2<br>3699  | CHEMBL1<br>42806  | ZINC049<br>03759 | ZINC125<br>04005 | ZINC397<br>10155 | ZINC273<br>11170 | ZINC085<br>86021 |
| 48 | 1c8k | CHEMBL<br>115395  | CHEMBL1<br>39461  | CHEMBL4<br>22632  | CHEMBL1<br>15341 | CHEMBL1<br>14846  | ZINC092<br>80853 | ZINC223<br>25332 | ZINC396<br>09315 | ZINC091<br>25209 | ZINC436<br>01235 |
| 49 | 1d3g | CHEMBL<br>48531   | CHEMBL1<br>54623  | CHEMBL2<br>00699  | CHEMBL1<br>42996 | CHEMBL1<br>97455  | ZINC076<br>54748 | ZINC189<br>40936 | ZINC413<br>93978 | ZINC415<br>75308 | ZINC219<br>37925 |
| 50 | 3g6z | CHEMBL<br>556348  | CHEMBL2<br>97894  | CHEMBL5<br>9128   | CHEMBL4<br>42105 | CHEMBL5<br>4458   | ZINC096<br>97182 | ZINC125<br>42530 | ZINC249<br>09700 | ZINC008<br>90753 | ZINC546<br>21198 |
| 51 | 1mv9 | CHEMBL<br>399326  | CHEMBL6<br>9091   | CHEMBL1<br>221641 | CHEMBL4<br>1260  | CHEMBL1<br>33915  | ZINC045<br>75695 | ZINC050<br>54084 | ZINC370<br>77386 | ZINC311<br>58331 | ZINC392<br>89303 |
| 52 | 3hmm | CHEMBL<br>260239  | CHEMBL5<br>75311  | CHEMBL5<br>65846  | CHEMBL6<br>252   | CHEMBL2<br>08437  | ZINC055<br>76624 | ZINC350<br>57420 | ZINC427<br>95984 | ZINC395<br>26406 | ZINC487<br>69076 |
| 53 | 1ype | CHEMBL<br>163312  | CHEMBL1<br>67741  | CHEMBL1<br>38267  | CHEMBL1<br>38986 | CHEMBL5<br>43817  | ZINC061<br>34461 | ZINC124<br>67587 | ZINC209<br>06320 | ZINC215<br>43727 | ZINC632<br>12710 |
| 54 | 1syn | CHEMBL<br>166027  | CHEMBL1<br>32934  | CHEMBL3<br>6639   | CHEMBL1<br>70101 | CHEMBL4<br>15447  | ZINC054<br>87745 | ZINC132<br>77586 | ZINC020<br>95830 | ZINC449<br>18823 | ZINC160<br>09610 |
| 55 | 1sqt | CHEMBL<br>283082  | CHEMBL3<br>69042  | CHEMBL5<br>0649   | CHEMBL1<br>84844 | CHEMBL5<br>97370  | ZINC203<br>56899 | ZINC353<br>82343 | ZINC500<br>32308 | ZINC458<br>90114 | ZINC581<br>12857 |
| 56 | 3hI5 | CHEMBL<br>365298  | CHEMBL2<br>21647  | CHEMBL4<br>87973  | CHEMBL3<br>69736 | CHEMBL4<br>81213  | ZINC069<br>48467 | ZINC132<br>76326 | ZINC392<br>87920 | ZINC392<br>93977 | ZINC576<br>29966 |

**Table S2.** Tanimoto scores between the active compounds selected from DUD-E dataset.

| No. | Target PDB | Active compounds |       |       |       |       |       |       |       |       |       |
|-----|------------|------------------|-------|-------|-------|-------|-------|-------|-------|-------|-------|
|     |            | 1 & 2            | 1 & 3 | 1 & 4 | 1 & 5 | 2 & 3 | 2 & 4 | 2 & 5 | 3 & 4 | 3 & 5 | 4 & 5 |
| 1   | 2hzi       | 0.95             | 0.28  | 0.29  | 0.33  | 0.28  | 0.29  | 0.34  | 0.35  | 0.33  | 0.34  |
| 2   | 2oi0       | 0.41             | 0.51  | 0.28  | 0.51  | 0.56  | 0.19  | 0.50  | 0.20  | 0.49  | 0.20  |
| 3   | 3cqW       | 0.30             | 0.28  | 0.28  | 0.49  | 0.26  | 0.90  | 0.29  | 0.28  | 0.37  | 0.29  |
| 4   | 3d0e       | 0.22             | 0.17  | 0.26  | 0.17  | 0.22  | 0.31  | 0.27  | 0.23  | 0.17  | 0.28  |
| 5   | 2hv5       | 0.27             | 0.21  | 0.20  | 0.13  | 0.20  | 0.24  | 0.12  | 0.30  | 0.13  | 0.14  |
| 6   | 1l2s       | 0.07             | 0.14  | 0.15  | 0.09  | 0.16  | 0.18  | 0.14  | 0.20  | 0.16  | 0.11  |
| 7   | 2am9       | 0.09             | 0.05  | 0.39  | 0.38  | 0.19  | 0.11  | 0.07  | 0.10  | 0.05  | 0.41  |
| 8   | 1s3b       | 0.11             | 0.15  | 0.14  | 0.14  | 0.18  | 0.19  | 0.22  | 0.31  | 0.14  | 0.13  |
| 9   | 1bcd       | 0.10             | 0.19  | 0.24  | 0.14  | 0.09  | 0.11  | 0.23  | 0.16  | 0.24  | 0.12  |
| 10  | 2cnk       | 0.22             | 0.31  | 0.30  | 0.25  | 0.30  | 0.16  | 0.49  | 0.26  | 0.44  | 0.24  |
| 11  | 1h00       | 0.23             | 0.17  | 0.22  | 0.18  | 0.23  | 0.24  | 0.29  | 0.18  | 0.37  | 0.19  |
| 12  | 3l5d       | 0.17             | 0.80  | 0.17  | 0.13  | 0.19  | 0.98  | 0.20  | 0.20  | 0.17  | 0.20  |
| 13  | 1r9o       | 0.18             | 0.20  | 0.20  | 0.26  | 0.13  | 0.20  | 0.22  | 0.13  | 0.16  | 0.29  |
| 14  | 3nxu       | 0.37             | 0.19  | 0.24  | 0.27  | 0.17  | 0.24  | 0.36  | 0.14  | 0.16  | 0.22  |
| 15  | 3nxo       | 0.20             | 0.19  | 0.22  | 0.22  | 0.39  | 0.38  | 0.42  | 0.32  | 0.39  | 0.34  |
| 16  | 2rgp       | 0.25             | 0.41  | 0.20  | 0.21  | 0.28  | 0.20  | 0.17  | 0.28  | 0.14  | 0.20  |
| 17  | 1sj0       | 0.30             | 0.26  | 0.20  | 0.09  | 0.29  | 0.17  | 0.06  | 0.22  | 0.04  | 0.12  |
| 18  | 3kl6       | 0.16             | 0.21  | 0.20  | 0.17  | 0.34  | 0.42  | 0.24  | 0.27  | 0.50  | 0.23  |
| 19  | 1w7x       | 0.21             | 0.22  | 0.23  | 0.29  | 0.52  | 0.41  | 0.35  | 0.45  | 0.24  | 0.42  |
| 20  | 2nnq       | 0.13             | 0.12  | 0.13  | 0.13  | 0.18  | 0.89  | 0.89  | 0.17  | 0.17  | 0.97  |
| 21  | 1j4h       | 0.36             | 0.52  | 0.40  | 0.36  | 0.37  | 0.63  | 0.91  | 0.33  | 0.38  | 0.59  |
| 22  | 3e37       | 0.30             | 0.37  | 0.47  | 0.23  | 0.28  | 0.34  | 0.32  | 0.34  | 0.27  | 0.31  |
| 23  | 2v3f       | 0.42             | 0.21  | 0.21  | 0.32  | 0.31  | 0.31  | 0.57  | 0.98  | 0.59  | 0.59  |
| 24  | 3kge       | 0.25             | 0.18  | 0.24  | 0.38  | 0.23  | 0.37  | 0.25  | 0.24  | 0.15  | 0.25  |
| 25  | 1vso       | 0.12             | 0.22  | 0.24  | 0.16  | 0.15  | 0.14  | 0.12  | 0.23  | 0.20  | 0.12  |
| 26  | 3nf7       | 0.26             | 0.18  | 0.22  | 0.25  | 0.21  | 0.13  | 0.22  | 0.12  | 0.36  | 0.16  |
| 27  | 1xl2       | 0.41             | 0.14  | 0.15  | 0.17  | 0.19  | 0.26  | 0.18  | 0.46  | 0.29  | 0.25  |
| 28  | 1uyg       | 0.98             | 0.10  | 0.09  | 0.08  | 0.10  | 0.09  | 0.08  | 0.09  | 0.08  | 0.64  |
| 29  | 3f9m       | 0.43             | 0.37  | 0.32  | 0.33  | 0.25  | 0.30  | 0.28  | 0.27  | 0.22  | 0.53  |
| 30  | 2oj9       | 0.28             | 0.33  | 0.31  | 0.28  | 0.26  | 0.40  | 0.37  | 0.35  | 0.30  | 0.33  |
| 31  | 2h7l       | 0.21             | 0.53  | 0.23  | 0.19  | 0.20  | 0.76  | 0.58  | 0.18  | 0.28  | 0.59  |
| 32  | 2ica       | 0.75             | 0.31  | 0.35  | 0.26  | 0.32  | 0.36  | 0.23  | 0.42  | 0.31  | 0.38  |
| 33  | 3lpb       | 0.73             | 0.30  | 0.29  | 0.24  | 0.28  | 0.30  | 0.23  | 0.31  | 0.21  | 0.30  |
| 34  | 3g0e       | 0.32             | 0.20  | 0.22  | 0.27  | 0.18  | 0.25  | 0.27  | 0.27  | 0.39  | 0.30  |
| 35  | 2b8t       | 0.55             | 0.58  | 0.63  | 0.49  | 0.34  | 0.83  | 0.87  | 0.39  | 0.32  | 0.72  |
| 36  | 2of2       | 0.42             | 0.30  | 0.29  | 0.39  | 0.29  | 0.31  | 0.74  | 0.24  | 0.28  | 0.31  |
| 37  | 2aa2       | 0.39             | 0.03  | 0.32  | 0.24  | 0.05  | 0.24  | 0.23  | 0.06  | 0.05  | 0.18  |

|    |      |      |      |      |      |      |      |      |      |      |      |
|----|------|------|------|------|------|------|------|------|------|------|------|
| 38 | 2ojg | 0.14 | 0.89 | 0.39 | 0.84 | 0.16 | 0.18 | 0.19 | 0.39 | 0.80 | 0.40 |
| 39 | 2zdt | 0.26 | 0.21 | 0.24 | 0.20 | 0.23 | 0.19 | 0.22 | 0.28 | 0.95 | 0.29 |
| 40 | 2qd9 | 0.50 | 0.25 | 0.23 | 0.22 | 0.24 | 0.20 | 0.16 | 0.29 | 0.24 | 0.24 |
| 41 | 830c | 0.18 | 0.21 | 0.29 | 0.29 | 0.29 | 0.23 | 0.26 | 0.21 | 0.28 | 0.25 |
| 42 | 3eqh | 0.23 | 0.11 | 0.11 | 0.06 | 0.22 | 0.27 | 0.12 | 0.20 | 0.27 | 0.07 |
| 43 | 1kvo | 0.08 | 0.07 | 0.69 | 0.22 | 0.45 | 0.09 | 0.09 | 0.08 | 0.11 | 0.21 |
| 44 | 2p54 | 0.26 | 0.43 | 0.19 | 0.24 | 0.32 | 0.31 | 0.24 | 0.23 | 0.24 | 0.20 |
| 45 | 3kba | 0.29 | 0.21 | 0.20 | 0.60 | 0.10 | 0.16 | 0.24 | 0.29 | 0.19 | 0.17 |
| 46 | 2azr | 0.19 | 0.12 | 0.14 | 0.25 | 0.11 | 0.25 | 0.20 | 0.14 | 0.17 | 0.18 |
| 47 | 1njs | 0.50 | 0.76 | 0.44 | 0.44 | 0.48 | 0.61 | 0.77 | 0.50 | 0.52 | 0.72 |
| 48 | 1c8k | 0.25 | 0.25 | 0.86 | 0.66 | 0.96 | 0.24 | 0.26 | 0.25 | 0.26 | 0.64 |
| 49 | 1d3g | 0.30 | 0.31 | 0.18 | 0.32 | 0.43 | 0.28 | 0.62 | 0.22 | 0.42 | 0.27 |
| 50 | 3g6z | 0.37 | 0.53 | 0.42 | 0.51 | 0.42 | 0.43 | 0.43 | 0.35 | 0.70 | 0.30 |
| 51 | 1mv9 | 0.20 | 0.29 | 0.34 | 0.28 | 0.27 | 0.22 | 0.32 | 0.15 | 0.14 | 0.44 |
| 52 | 3hmm | 0.32 | 0.26 | 0.27 | 0.56 | 0.25 | 0.26 | 0.35 | 0.27 | 0.25 | 0.37 |
| 53 | 1ype | 0.23 | 0.21 | 0.35 | 0.23 | 0.18 | 0.23 | 0.21 | 0.48 | 0.33 | 0.28 |
| 54 | 1syn | 0.24 | 0.51 | 0.51 | 0.23 | 0.24 | 0.29 | 0.71 | 0.57 | 0.22 | 0.27 |
| 55 | 1sqt | 0.18 | 0.24 | 0.17 | 0.32 | 0.18 | 0.18 | 0.31 | 0.26 | 0.23 | 0.21 |
| 56 | 3hl5 | 0.24 | 0.31 | 0.43 | 0.66 | 0.15 | 0.21 | 0.27 | 0.48 | 0.44 | 0.60 |

---

**Table S3.** Tanimoto scores between the decoy compounds selected from DUD-E dataset.

| No. | Target PDB | Decoy compounds |       |       |       |       |       |       |       |       |       |
|-----|------------|-----------------|-------|-------|-------|-------|-------|-------|-------|-------|-------|
|     |            | 1 & 2           | 1 & 3 | 1 & 4 | 1 & 5 | 2 & 3 | 2 & 4 | 2 & 5 | 3 & 4 | 3 & 5 | 4 & 5 |
| 1   | 2hzi       | 0.11            | 0.20  | 0.28  | 0.09  | 0.13  | 0.15  | 0.17  | 0.33  | 0.19  | 0.10  |
| 2   | 2o10       | 0.27            | 0.12  | 0.16  | 0.25  | 0.08  | 0.20  | 0.26  | 0.09  | 0.09  | 0.23  |
| 3   | 3cqW       | 0.53            | 0.16  | 0.17  | 0.15  | 0.22  | 0.15  | 0.15  | 0.18  | 0.17  | 0.30  |
| 4   | 3d0e       | 0.30            | 0.46  | 0.18  | 0.19  | 0.24  | 0.16  | 0.20  | 0.18  | 0.18  | 0.25  |
| 5   | 2hv5       | 0.52            | 0.17  | 0.18  | 0.21  | 0.19  | 0.12  | 0.31  | 0.10  | 0.21  | 0.19  |
| 6   | 1l2s       | 0.22            | 0.16  | 0.14  | 0.23  | 0.19  | 0.16  | 0.23  | 0.17  | 0.19  | 0.12  |
| 7   | 2am9       | 0.16            | 0.19  | 0.16  | 0.21  | 0.34  | 0.14  | 0.14  | 0.12  | 0.17  | 0.15  |
| 8   | 1s3b       | 0.06            | 0.40  | 0.06  | 0.12  | 0.10  | 0.15  | 0.19  | 0.14  | 0.17  | 0.22  |
| 9   | 1bcd       | 0.22            | 0.20  | 0.20  | 0.07  | 0.16  | 0.16  | 0.24  | 0.20  | 0.19  | 0.12  |
| 10  | 2cnk       | 0.28            | 0.19  | 0.38  | 0.18  | 0.31  | 0.27  | 0.17  | 0.18  | 0.11  | 0.16  |
| 11  | 1h00       | 0.15            | 0.12  | 0.22  | 0.22  | 0.16  | 0.14  | 0.12  | 0.19  | 0.18  | 0.20  |
| 12  | 3l5d       | 0.86            | 0.29  | 0.19  | 0.21  | 0.29  | 0.18  | 0.20  | 0.18  | 0.16  | 0.11  |
| 13  | 1r9o       | 0.22            | 0.24  | 0.16  | 0.24  | 0.40  | 0.28  | 0.14  | 0.26  | 0.18  | 0.17  |
| 14  | 3nxu       | 0.22            | 0.15  | 0.22  | 0.19  | 0.11  | 0.18  | 0.19  | 0.15  | 0.32  | 0.22  |
| 15  | 3nxo       | 0.16            | 0.36  | 0.24  | 0.28  | 0.17  | 0.14  | 0.15  | 0.15  | 0.63  | 0.16  |
| 16  | 2rgp       | 0.16            | 0.23  | 0.18  | 0.21  | 0.19  | 0.15  | 0.24  | 0.22  | 0.27  | 0.21  |
| 17  | 1sj0       | 0.26            | 0.13  | 0.16  | 0.26  | 0.08  | 0.10  | 0.19  | 0.15  | 0.13  | 0.20  |
| 18  | 3kl6       | 0.23            | 0.21  | 0.22  | 0.19  | 0.23  | 0.21  | 0.26  | 0.29  | 0.22  | 0.19  |
| 19  | 1w7x       | 0.40            | 0.26  | 0.27  | 0.17  | 0.48  | 0.45  | 0.31  | 0.31  | 0.24  | 0.40  |
| 20  | 2nnq       | 0.24            | 0.18  | 0.30  | 0.15  | 0.20  | 0.17  | 0.19  | 0.19  | 0.25  | 0.30  |
| 21  | 1j4h       | 0.18            | 0.19  | 0.24  | 0.16  | 0.20  | 0.25  | 0.33  | 0.20  | 0.22  | 0.22  |
| 22  | 3e37       | 0.08            | 0.09  | 0.16  | 0.21  | 0.20  | 0.20  | 0.16  | 0.12  | 0.14  | 0.18  |
| 23  | 2v3f       | 0.17            | 0.19  | 0.15  | 0.17  | 0.20  | 0.21  | 0.23  | 0.22  | 0.17  | 0.19  |
| 24  | 3kge       | 0.13            | 0.37  | 0.17  | 0.11  | 0.11  | 0.11  | 0.11  | 0.11  | 0.15  | 0.15  |
| 25  | 1vso       | 0.20            | 0.16  | 0.04  | 0.17  | 0.16  | 0.06  | 0.17  | 0.12  | 0.23  | 0.08  |
| 26  | 3nf7       | 0.22            | 0.20  | 0.15  | 0.11  | 0.18  | 0.17  | 0.12  | 0.18  | 0.18  | 0.37  |
| 27  | 1xl2       | 0.23            | 0.62  | 0.18  | 0.20  | 0.19  | 0.37  | 0.25  | 0.14  | 0.18  | 0.28  |
| 28  | 1uyg       | 0.31            | 0.17  | 0.22  | 0.17  | 0.20  | 0.28  | 0.16  | 0.15  | 0.17  | 0.19  |
| 29  | 3f9m       | 0.18            | 0.16  | 0.14  | 0.18  | 0.29  | 0.21  | 0.20  | 0.36  | 0.26  | 0.40  |
| 30  | 2oj9       | 0.14            | 0.21  | 0.16  | 0.14  | 0.11  | 0.26  | 0.30  | 0.14  | 0.13  | 0.27  |
| 31  | 2h7l       | 0.22            | 0.19  | 0.28  | 0.12  | 0.08  | 0.16  | 0.11  | 0.09  | 0.08  | 0.12  |
| 32  | 2ica       | 0.19            | 0.38  | 0.23  | 0.18  | 0.19  | 0.22  | 0.37  | 0.17  | 0.17  | 0.22  |
| 33  | 3lpb       | 0.13            | 0.18  | 0.11  | 0.17  | 0.18  | 0.15  | 0.17  | 0.13  | 0.20  | 0.18  |
| 34  | 3g0e       | 0.17            | 0.22  | 0.18  | 0.24  | 0.25  | 0.21  | 0.23  | 0.16  | 0.22  | 0.16  |
| 35  | 2b8t       | 0.11            | 0.01  | 0.08  | 0.15  | 0.07  | 0.08  | 0.12  | 0.07  | 0.12  | 0.15  |
| 36  | 2of2       | 0.16            | 0.55  | 0.28  | 0.25  | 0.18  | 0.21  | 0.13  | 0.32  | 0.25  | 0.22  |
| 37  | 2aa2       | 0.20            | 0.20  | 0.24  | 0.18  | 0.53  | 0.20  | 0.28  | 0.18  | 0.24  | 0.18  |

|    |      |      |      |      |      |      |      |      |      |      |      |
|----|------|------|------|------|------|------|------|------|------|------|------|
| 38 | 2ojg | 0.12 | 0.05 | 0.05 | 0.03 | 0.08 | 0.05 | 0.10 | 0.11 | 0.03 | 0.06 |
| 39 | 2zdt | 0.17 | 0.06 | 0.10 | 0.17 | 0.10 | 0.12 | 0.29 | 0.09 | 0.18 | 0.18 |
| 40 | 2qd9 | 0.18 | 0.26 | 0.16 | 0.17 | 0.29 | 0.16 | 0.35 | 0.21 | 0.42 | 0.17 |
| 41 | 830c | 0.19 | 0.14 | 0.21 | 0.25 | 0.21 | 0.18 | 0.29 | 0.24 | 0.28 | 0.22 |
| 42 | 3eqh | 0.69 | 0.17 | 0.12 | 0.21 | 0.17 | 0.13 | 0.18 | 0.26 | 0.19 | 0.09 |
| 43 | 1kvo | 0.35 | 0.15 | 0.24 | 0.07 | 0.23 | 0.30 | 0.10 | 0.27 | 0.25 | 0.11 |
| 44 | 2p54 | 0.22 | 0.22 | 0.23 | 0.23 | 0.43 | 0.18 | 0.26 | 0.19 | 0.21 | 0.27 |
| 45 | 3kba | 0.11 | 0.14 | 0.10 | 0.15 | 0.15 | 0.20 | 0.37 | 0.09 | 0.07 | 0.21 |
| 46 | 2azr | 0.20 | 0.21 | 0.28 | 0.28 | 0.24 | 0.23 | 0.30 | 0.19 | 0.19 | 0.31 |
| 47 | 1njs | 0.20 | 0.13 | 0.19 | 0.18 | 0.13 | 0.12 | 0.87 | 0.23 | 0.14 | 0.13 |
| 48 | 1c8k | 0.23 | 0.25 | 0.19 | 0.12 | 0.27 | 0.37 | 0.12 | 0.25 | 0.12 | 0.22 |
| 49 | 1d3g | 0.15 | 0.18 | 0.25 | 0.19 | 0.15 | 0.18 | 0.13 | 0.23 | 0.20 | 0.32 |
| 50 | 3g6z | 0.33 | 0.22 | 0.24 | 0.29 | 0.27 | 0.29 | 0.33 | 0.21 | 0.19 | 0.21 |
| 51 | 1mv9 | 0.17 | 0.13 | 0.09 | 0.21 | 0.16 | 0.09 | 0.14 | 0.09 | 0.27 | 0.10 |
| 52 | 3hmm | 0.14 | 0.14 | 0.18 | 0.11 | 0.09 | 0.13 | 0.13 | 0.22 | 0.17 | 0.20 |
| 53 | 1ype | 0.66 | 0.21 | 0.22 | 0.19 | 0.18 | 0.21 | 0.17 | 0.20 | 0.19 | 0.17 |
| 54 | 1syn | 0.15 | 0.21 | 0.20 | 0.29 | 0.21 | 0.34 | 0.26 | 0.21 | 0.22 | 0.36 |
| 55 | 1sqt | 0.12 | 0.25 | 0.12 | 0.15 | 0.20 | 0.36 | 0.34 | 0.18 | 0.28 | 0.23 |
| 56 | 3hl5 | 0.25 | 0.32 | 0.09 | 0.18 | 0.42 | 0.09 | 0.34 | 0.11 | 0.32 | 0.21 |

---

**Table S4.** List of ligands with crystal structures selected for cross-docking

| protein class    | target | PDB ID   |          |          |          |          |
|------------------|--------|----------|----------|----------|----------|----------|
|                  |        | ligand 1 | ligand 2 | ligand 3 | ligand 4 | ligand 5 |
| kinase           | 2of2   | 2zyb     | 3kxz     | 3ack     | 2of4     | 2ofv     |
| protease         | 3kl6   | 2p16     | 1f0r     | 2w26     | 2vh6     | 2xbw     |
| other enzyme     | 2azr   | 2cm8     | 2cma     | 2cng     | 2cm7     | 1q6m     |
| nuclear receptor | 1mv9   | 1mvc     | 1fm9     | 2acl     | 1fby     | 2plu     |
| ion channel      | 1vso   | 2wky     | 3fvo     | 2znt     | 2pbw     | 2f35     |
| Cytochrome P450  | 3nxu   | 1w0g     | 2j0d     | 2v0m     |          |          |
| miscellaneous    | 3hl5   | 2jk7     | 2opy     | 3cm2     | 3cm7     | 3eyl     |

**Table S5.** MD simulation speed (GPU hours) for the smallest and biggest systems in this study.

| Target PDB | Number of residues | Atom numbers | Speed (hours/ns) * |
|------------|--------------------|--------------|--------------------|
| 1j4h       | 107                | 23,310       | 0.119              |
| 3e3f       | 540                | 57,164       | 0.266              |

\*Simulation speed in real time hours per nanoseconds in MD simulation



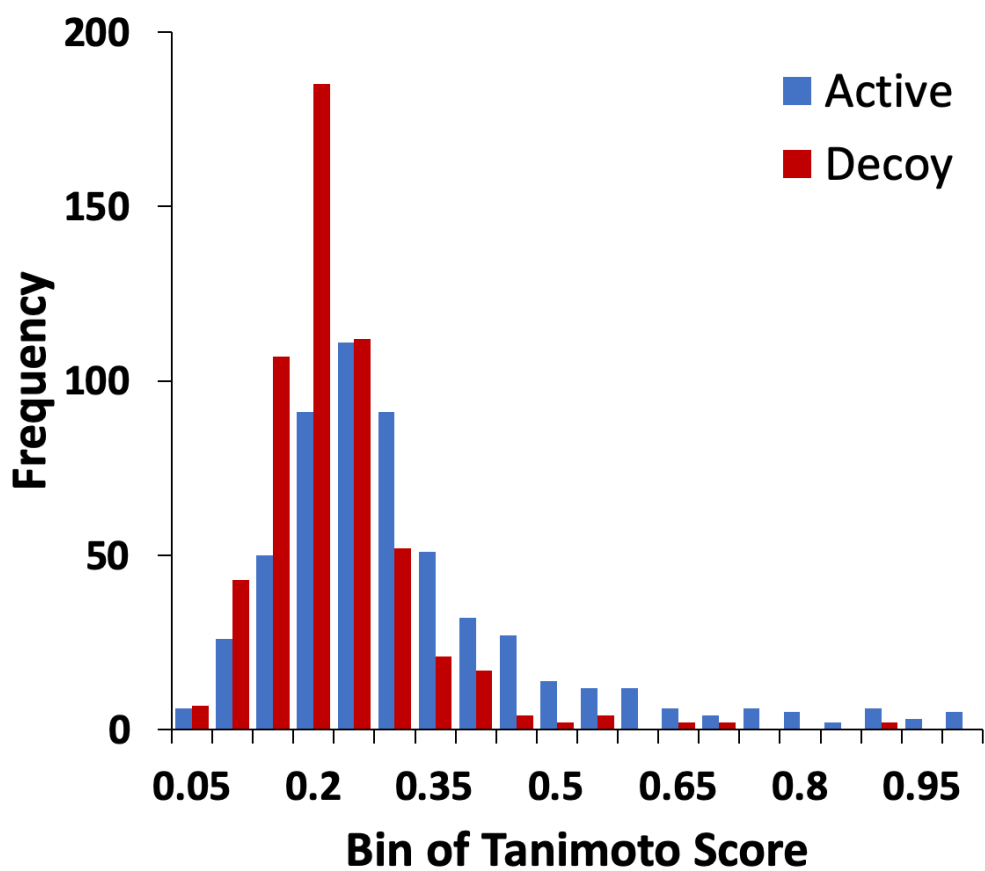

**Figure S1.** Histogram distributions of Tanimoto scores from active compounds (blue) and decoy compounds (red). Overall, the majority of compounds used in this study are not similar to one another.

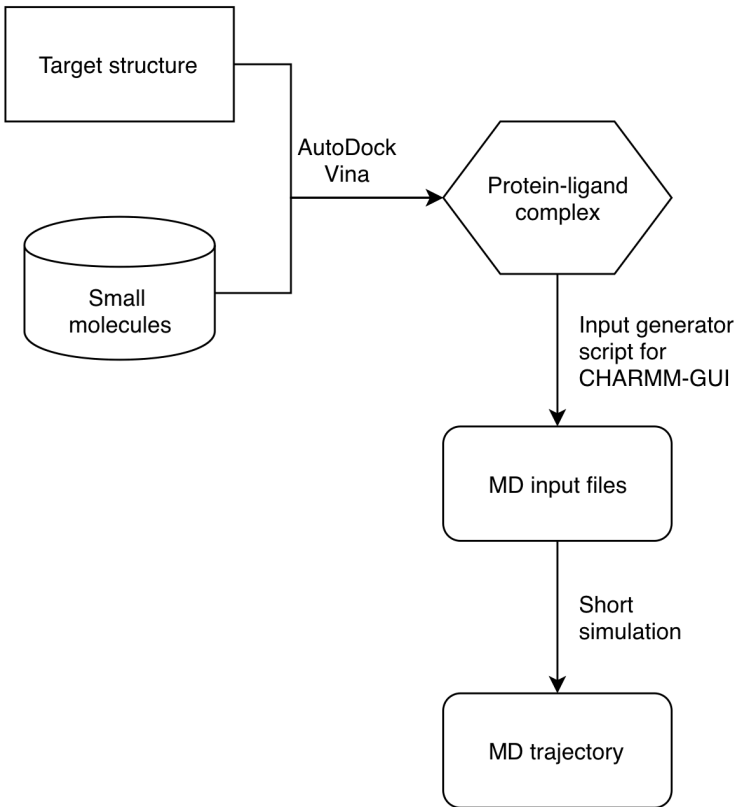

**Figure S2.** Schematic workflow

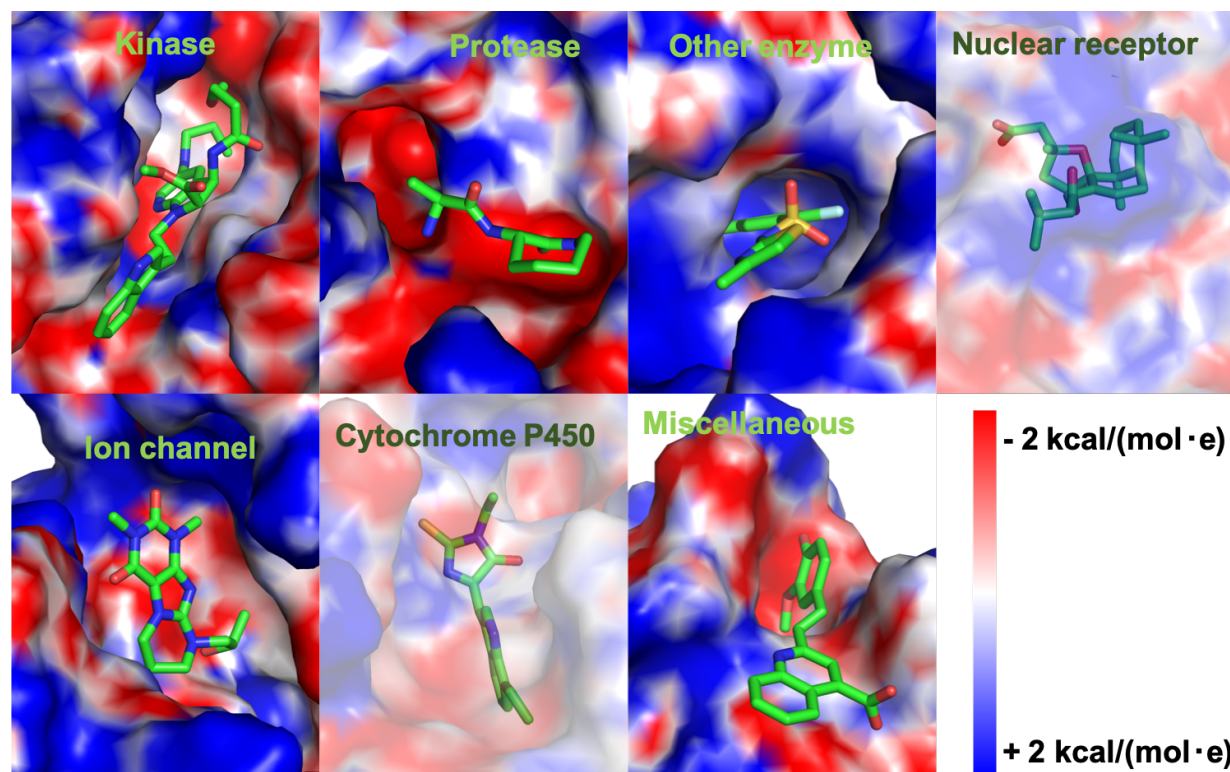

**Figure S3.** Surface representations showing electrostatic potentials with bound decoy ligands from docking runs for representative proteins from 7 different classes. Kinase: tyrosine protein kinase (PDB 2of2) with decoy 5. Protease: blood coagulation factor VIIa (PDB 1w7x) with decoy 2. Other enzyme: thymidine kinase (PDB 2b8t) with decoy 2. Nuclear receptor: retinoid x receptor (PDB 1mv9) with decoy 1. Ion channel: glutamate receptor LBD (PDB 1vso) with decoy 5. Cytochrome P450: CYP3A4 (PDB 3nxu) with decoy 3. Miscellaneous: inhibitor of apoptosis (PDB 3hl5) with decoy 1. A transparent surface is used to show ligands buried in nuclear receptor and cytochrome P450.

**Script S1.** Python script for high-throughput protein-ligand complex MD simulations using CHARMM-GUI webserver.

```
#!/usr/bin/env python
#-----
# Written by CHARMM-GUI team (www.charmm-gui.org)
# This suite uses the following softwares:
# a) google chrome browser
# b) python Splinter package (https://splinter.readthedocs.org/en/latest/)
# c) chromedriver (https://sites.google.com/a/chromium.org/chromedriver/downloads).
# chromedriver is required by Splinter. Make sure it is installed in your PATH
#-----

import time
import os
import sys
import urllib
import urllib2
import subprocess
from splinter import Browser

def download(browser, link, saveas):
    print "downloading %s to %s" % (link, saveas)
    url = "http://www.charmm-gui.org/?doc=input/download"
    user_agent = 'Mozilla/4.0 (compatible; MSIE 5.5; Windows NT)'
    headers = { 'User-Agent' : user_agent }
    link1 = link.split("&")
    tag=link1[1].split("=")[1]
    values = {'jobid' : tag,
             'archive' : 'tgz' }
    data = urllib.urlencode(values)
    req = urllib2.Request(url, data, headers)
    response = urllib2.urlopen(req)
    the_page = response.read()
    with open(saveas, "wb") as code:
        code.write(the_page)
    fsize = float(os.stat(saveas).st_size)/(1024.0*1024.0)
    print "download complete, file size is %5.2f MB"%fsize

def get_download_link(browser):
    while True:
        try:
            downlink = browser.find_link_by_text("download.tgz")[-1]
            d = downlink['href']
            if d == None:
                time.sleep(1)
                continue
            else:
                return d
        except:
            print "waiting for download link, sleep for 2 s"
            time.sleep(2)

def check_error(browser):
    while True:
```

```

try:
    res = browser.is_text_present("CHARMM was terminated abnormally")
    if res == True:
        status = "Failed"
        print "Build Failed"
        return False
    if res == False:
        status = "Success"
        return True
except:
    print "check_error sleep for 1 second"
    time.sleep(1)

def wait_for_text(browser, text):
    print "  waiting for %s" % text
    while True:
        try:
            res = browser.is_text_present(text)
            if res == True:
                break
        except:
            print "  sleep for 2 seconds"
            time.sleep(2)

def next_step(browser, text):
    browser.execute_script("proceed()")
    print "  Goto next step"
    wait_for_text(browser, text)

def run(cwd, ndir, fname, segid):

    print "run Quick MD Simulator using protein-ligand complex in %s directory" % ndir

    browser = Browser('chrome')
    url = "http://www.charmm-gui.org/input/solution"
    browser.visit(url)
    window = browser.windows[0]

    browser.attach_file('file', "%s/%s/%s" % (cwd, ndir, fname))
    browser.find_by_value("CHARMM").click()

    next_step(browser, "Manipulate PDB")
    browser.find_by_name("chains[%s][checked]" % segid.upper()).check()

    next_step(browser, "Generate PDB")
    browser.attach_file("mol2_cgenff[LIG]", "%s/%s/ligand.mol2" % (cwd, ndir))

    next_step(browser, "Solvate Molecule")
    if check_error(browser) == False:
        return browser, get_download_link(browser), status
    browser.select('ion_method', 'dist')

    next_step(browser, "Setup Periodic Boundary Condition")
    if check_error(browser) == False:
        return browser, get_download_link(browser), status

```

```

next_step(browser, "Generate Equilibration and Dynamics inputs")
browser.find_by_name("omm_checked").check()
if check_error(browser) == False:
    return browser, get_download_link(browser), status

next_step(browser, "step5_production.inp")

check_error(browser)
link = get_download_link(browser)
print "Build success"
status = "Success"
return browser, link, status

if __name__ == "__main__":

    dircnt = int(0)
    ndir = "ligand%s" % dircnt
    while (os.path.exists(ndir)):
        flist = os.listdir(ndir)
        for i in flist:
            if "receptor.pdb" in i:
                fname = i
        lpdb = open("ligand%s/lig.pdb" % dircnt,'r')
        flag = True
        for line in lpdb:
            if flag and line.startswith("ATOM"):
                tempx = float(line[30:38])
                flag = False

        tpdb = open("ligand%s/" % dircnt + fname,'r')
        flag = True
        for line in tpdb:
            if flag and line.startswith("ATOM"):
                if line[17:20] == "LIG" and float(line[30:38]) == tempx:
                    segid = line[72:76]
                    flag = False

    cwd = os.getcwd()

    browser, link, status = run(cwd, ndir, fname, segid)

    if status == "Failed":
        download(browser, link, "failed.%s.quickmd.tar.gz"%ndir)
        print "#####Failed#####"
    else:
        download(browser, link, "%s.quickmd.tar.gz"%ndir)
        print "======"

    browser.quit()

    dircnt += 1
    ndir = "ligand%s" % dircnt

```
